# Supplementary material for: A novel immune resistance mechanism of melanoma cells controlled by the ADAR1 enzyme
Source: PubMed Central journal article supplement (PMC4745707; doi:10.18632/oncotarget.4905), 2015-08-21
Supplement: oncotarget-06-28999-s001.pdf [file oncotarget-06-28999-s001.pdf]

## SUPPLEMENTARY FIGURES AND TABLE

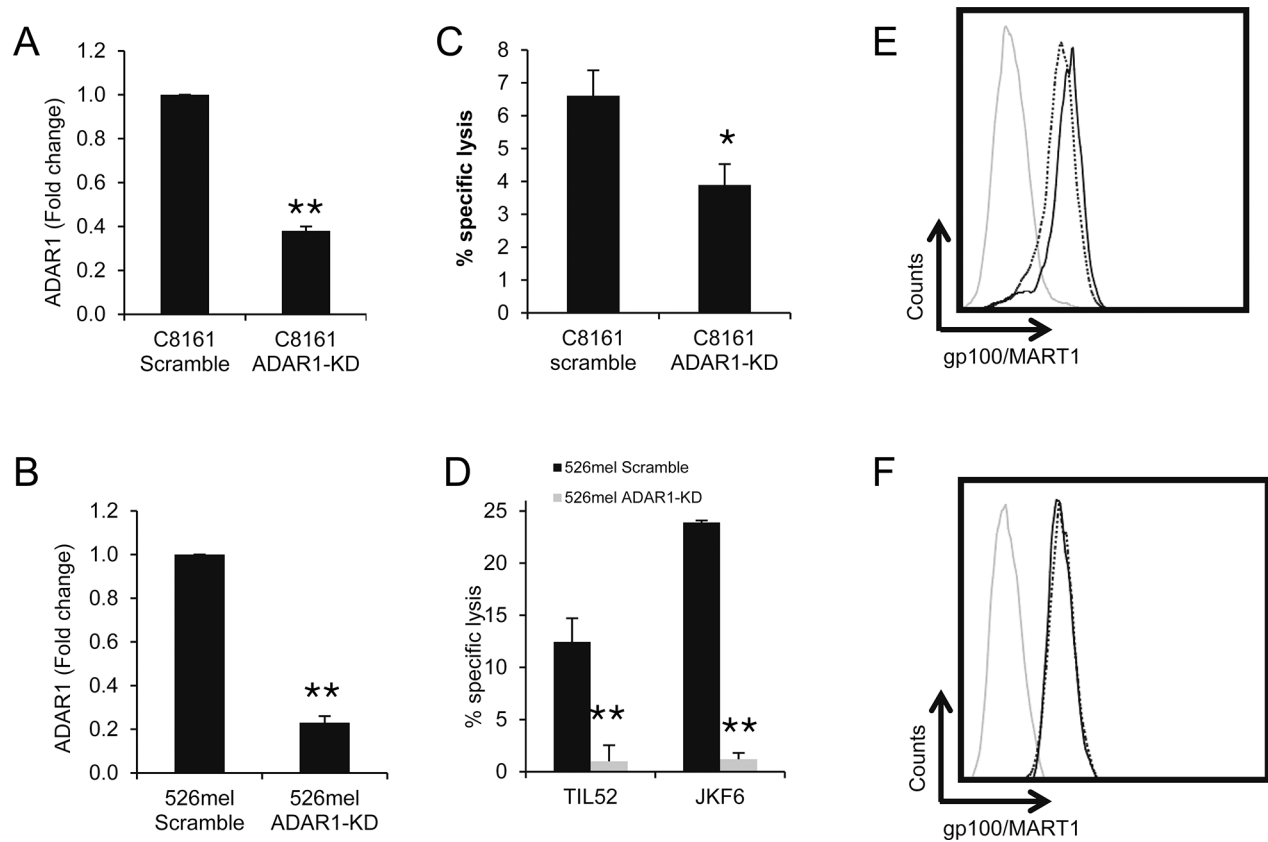

**Supplementary Figure S1: ADAR1 regulates melanoma immune resistance.** ADAR1 mRNA levels were assessed by qRT-PCR and normalized to GAPDH expression in C8161 **A**, and 526mel **B**, melanoma cells. CFSE-labeled C8161 ADAR1-KD and Scramble cells were co-incubated with TIL14 **C**, and CFSE-labeled 526mel ADAR1-KD and Scramble cells were co-incubated with TIL2 or JKF6 **D**, for 5 hours. Specific lysis of melanoma cells was assessed by flow cytometry. ADAR1-KD (dotted line) and Scramble (black line) cells were stained with anti-melanoma (gp100/MART1) antibody in C8161 **E**, and 526mel **F**, melanoma cells. Intracellular expression was analyzed by flow cytometry.

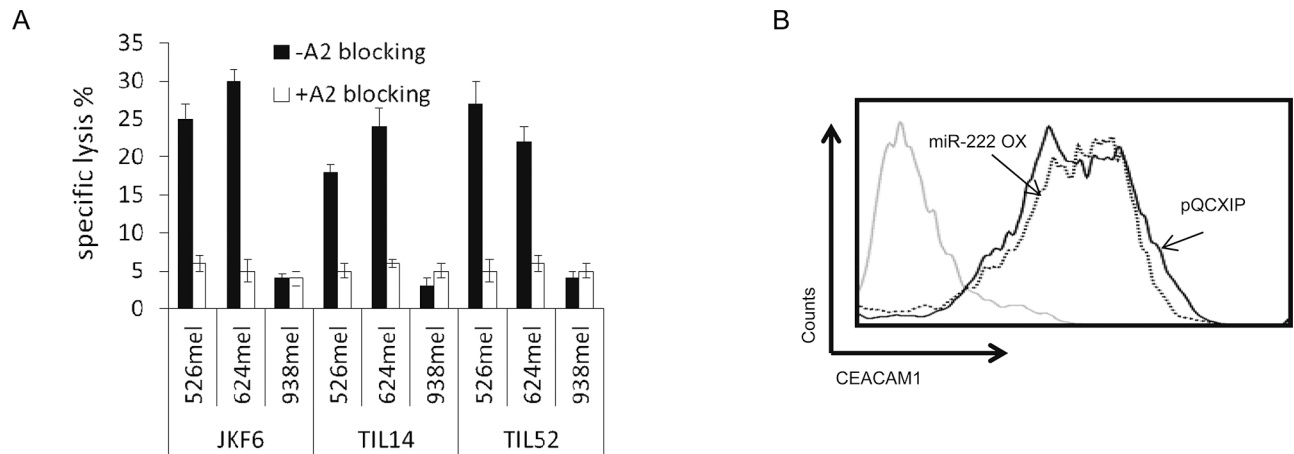

**Supplementary Figure S2: A.** TIL-mediated cytotoxicity is HLA-A2 restricted. CFSE-labeled 526mel, 624mel and 938mel cells were incubated with isotype control (-A2) or HLA-A2 antibody. After 1h, cells were co-incubated with JKF6 for 5h (E:T - 10:1). Specific lysis of melanoma cells was assessed by flow cytometry. **B.** miR-222 over-expression does not affect CEACAM1 protein expression. CEACAM1 protein expression in miR-222 OX (dotted line) and pQCXIP (black line) cells was analyzed by extracellular flow cytometry staining using FITC-Kat4C antibody (Dako, Glostrup, Denmark).

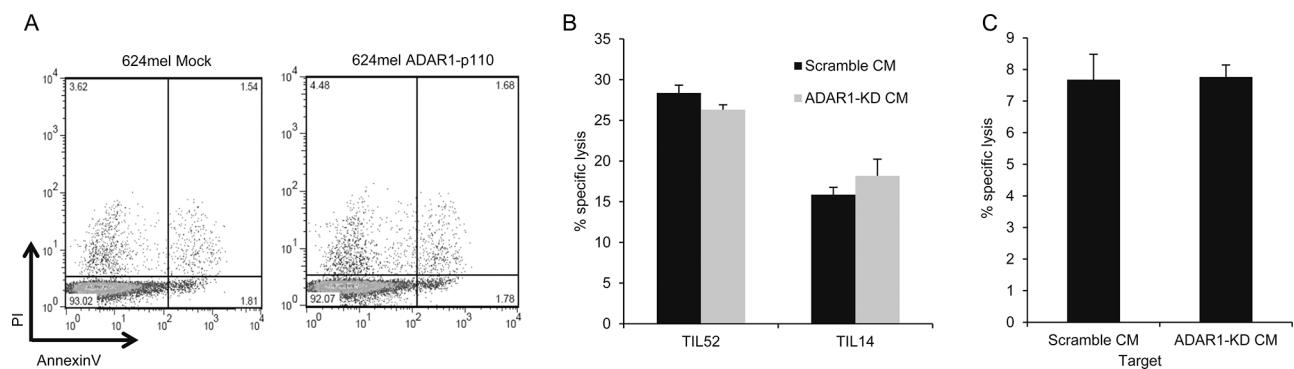

**Supplementary Figure S3: ADAR1 does not induce spontaneous apoptosis.** Spontaneous apoptosis of ADAR1-p110 and Mock cells was determined by AnnexinV and PI co-staining and analyzed by flow cytometry. **A. ADAR1-mediated regulation of melanoma immune resistance is dependent on cell-cell interaction.** TILs were pre-incubated with conditioned media (CM) from 624mel ADAR1-KD or Scramble cells. After 1h, the cells were co-incubated with non-manipulated melanoma cells; TIL52 or TIL14 were co-incubated with 526mel cells over-night **B.** and TIL52 were co-incubated with C8161 cells for 5 h **C.** Specific lysis of melanoma cells was assessed by flow cytometry.

**Supplementary Table S1: List of primers used**

| Gene                                    | Forward primer                                       | Reverse primer                                                 |
|-----------------------------------------|------------------------------------------------------|----------------------------------------------------------------|
| <i>Generation of constructs primers</i> |                                                      |                                                                |
| ADAR1 p110                              | 5'- GCTAAGCTTGCCGCCACCA<br>TGGCCGAGATCAAGGAGAAA      | 5'-GCTCTCGAGCTATACTGGGC<br>AGAGTTAAAAGTTCTTTTCCTCC             |
| ΔCAT-S                                  | 5'- GCTAAGCTTGCCGCCACCA<br>TGGCCGAGATCAAGGAGAAA      | 5'-GATCTCGAGCTAATGGT<br>GATGGTGATGATGCACTGG<br>GGTTACCTCTGTGAA |
| miR-222-precursor                       | 5'-AAGAATGCGGCCGCATGAT<br>CCAAAGAAAATGTGCA           | 5'-CGGAATTCGACTGCCCA<br>ATAATCTCTCTCA                          |
| miR-221-precursor                       | 5'-GTACGCGGCCGCCCCAGCA<br>TTTCTGACTGTTG              | 5'-GCCAATTCCTCCTGGA<br>AAACAGTTATTCAG                          |
| miR-222 promoter                        | 5'-CCGCTCGAGACAAGGGGCA<br>AAAGACCA                   | 5'-CCCAAGCTTTGGGTGAT<br>CCTTTGCCTT                             |
| ICAM1 UTR                               | 5'-CCGCTCGAGACCTATCCCG<br>GGACAGG                    | 5'- ATGCGCGGCCGCACTAA<br>CACAAAGGAAGTCTGGG                     |
| ICAM1 UTR MUT                           | 5'-GGGCCTTTGTGTTTTGAGG<br>ATAGACATGTCTATGGAGGGCCACTT | 5'-AAGTGGCCCTCCATAGA<br>CATGTCTATCCTCAAAACACAAAGGCC            |
| <i>qRT-PCR primers</i>                  |                                                      |                                                                |
| ADAR1                                   | 5'-ACAGCCAAAGACACTCCCTCTC                            | 5'-GGCTCAGCATGGCTATCTGG                                        |
| ADAR1-HIS                               | 5' GCTCTCCGTGTCTTGATTGGG                             | 5' TGGTGATGGTGATGATGCACTG                                      |
| ICAM1                                   | 5'-TGCAGACAGTGACCATCTACAGC                           | 5'-TCACCTCGGTCCCTTCTGAG                                        |
| GAPDH                                   | 5'-TGCACCACCAACTGCTTAGC                              | 5'-GGCATGGACTGTGGTCATGAG                                       |
| HPRT                                    | 5'-TGACACTGGCAAAACAATGCA                             | 5'-GGTCCTTTTCACCAGCAAGCT                                       |
| Pri-miR-222                             | 5'-AGCTGCTGGAAGGTGTAGGT                              | 5'-TCTCAGGACACTGAAGCAGAAG                                      |
